# Supplementary material for: Biobanking of patient and patient-derived xenograft ovarian tumour tissue: efficient preservation with low and high fetal calf serum based methods
Source: PubMed Central journal article supplement (PMC4594124; doi:10.1038/srep14495), 2015-10-06
Supplement: srep14495-s1.pdf [file srep14495-s1.pdf]

## **Supplementary information**

**Biobanking of patient and patient-derived xenograft ovarian tumour tissue:  
efficient preservation with low and high fetal calf serum based methods.**

Nicolette Alkema, Tushar Tomar, Evelien Duiker, Gert Jan Meersma, Harry Klip, Ate van der Zee, Bea Wisman, Steven de Jong

Supplementary figure 1

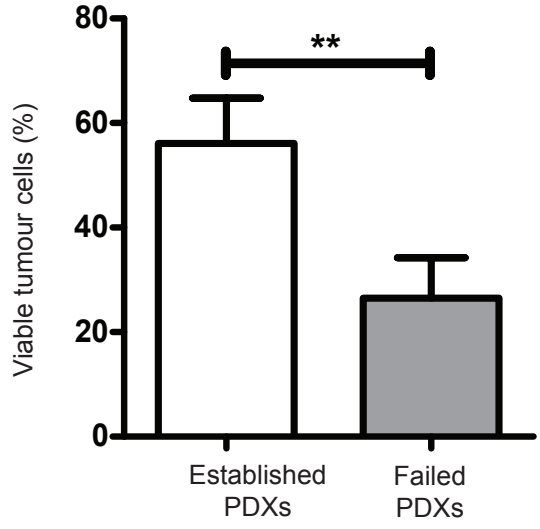

**Supplementary figure S1.** Percentage of tumour cells in H&E's obtained from representative tumour pieces of PDXs that either successfully engrafted or failed to engraft. \*\*=  $p < 0.01$ .

PDX 30

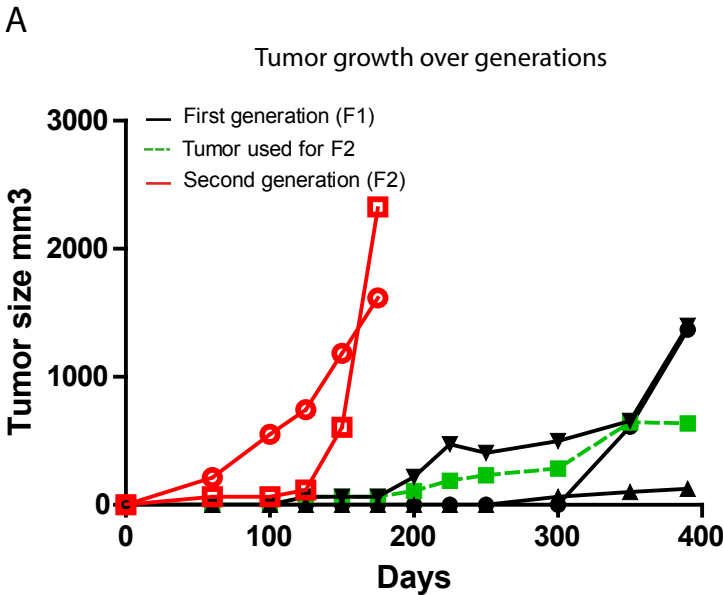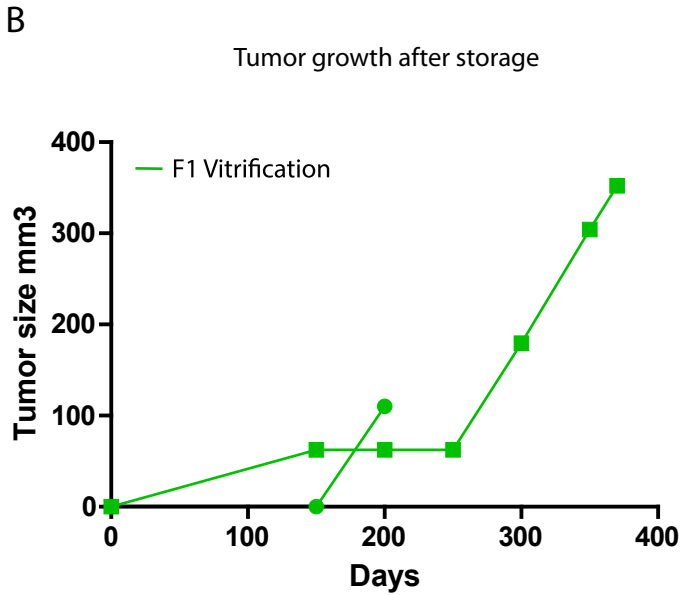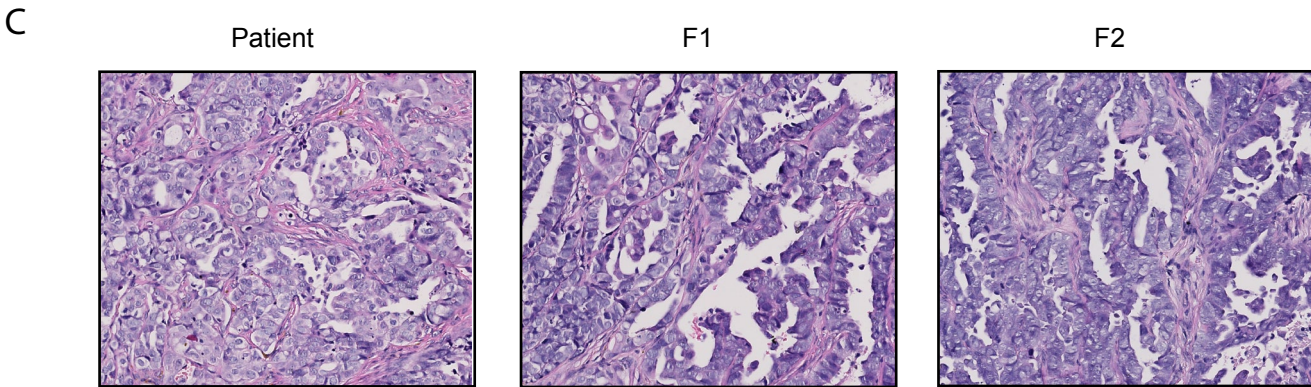



**Supplementary figure S2. (A)** Tumour growth of fresh implanted tumour tissue from patient 30 and further propagation of the tumour (green line) into the second generation (red lines). **(B)** Tumour growth of stored and subsequently thawed and re-implanted tumour tissue from patient 30. Tumour tissue was directly frozen after patients' primary surgery (F1) using the vitrification protocol. **(C)** Representative H&E staining of patient 30 over several generations (F1 and F2). Magnification 10x.

PDX 36

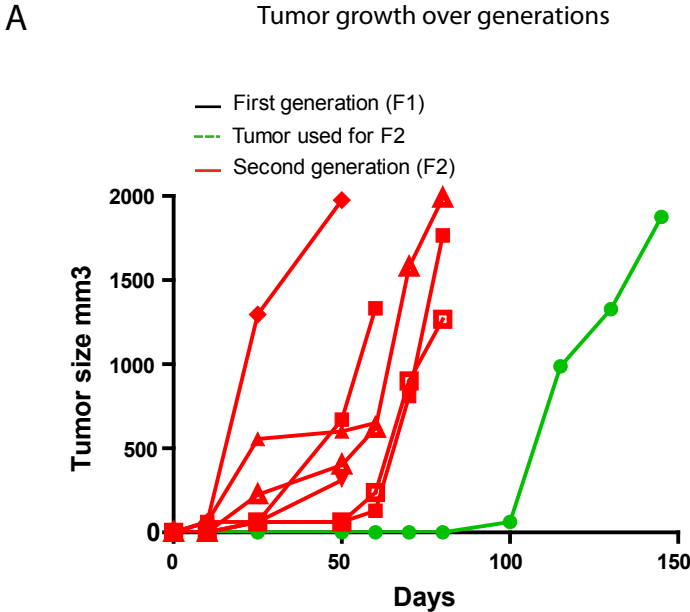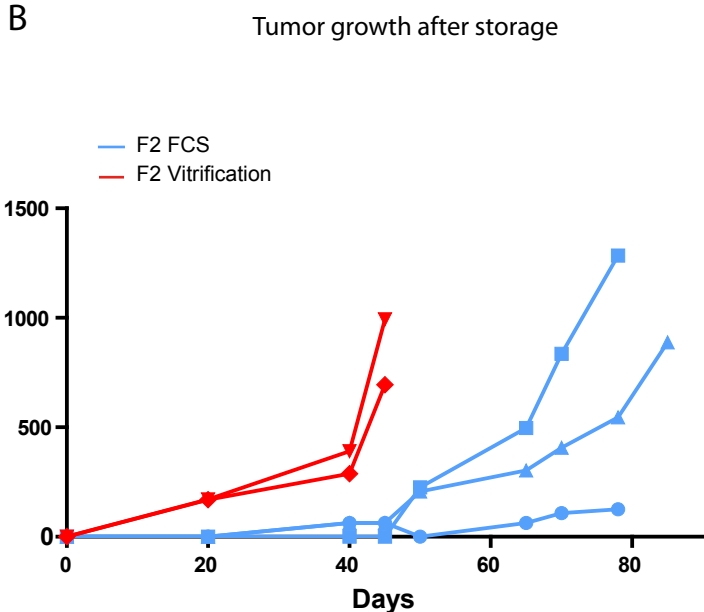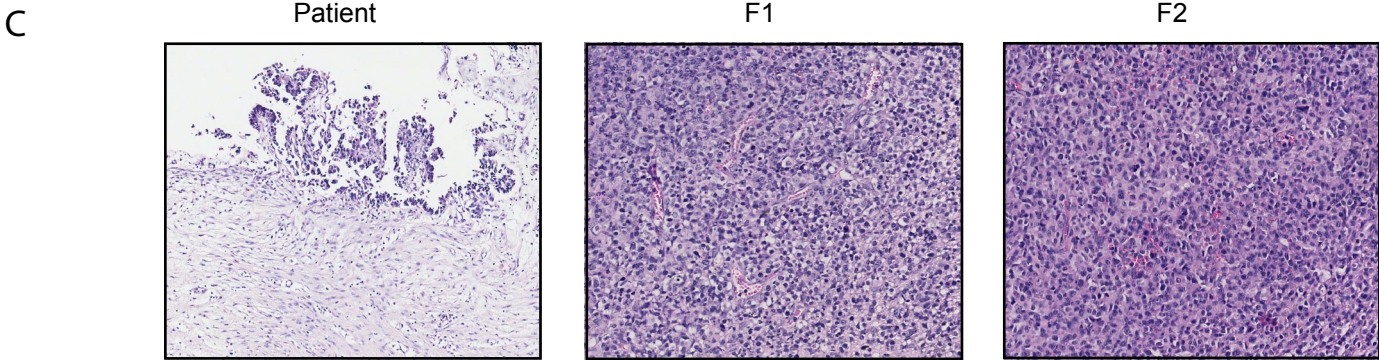

**Supplementary figure S3. (A)** Tumour growth of fresh implanted tumour tissue from patient 36 and further propagation of the tumour (green line) into the second generation (red lines). **(B)** Tumour growth of stored and subsequently thawed and re-implanted tumour tissue from patient 36. After establishment of a PDX, tumour tissue was harvested from the mouse (F2) and frozen using either the vitrification (red line) or FCS/DMSO (blue line) protocol. **(C)** Representative H&E staining of patient 36 over several generations (F1 and F2). Magnification 10x.

# Supplementary figure 4

## PDX 37

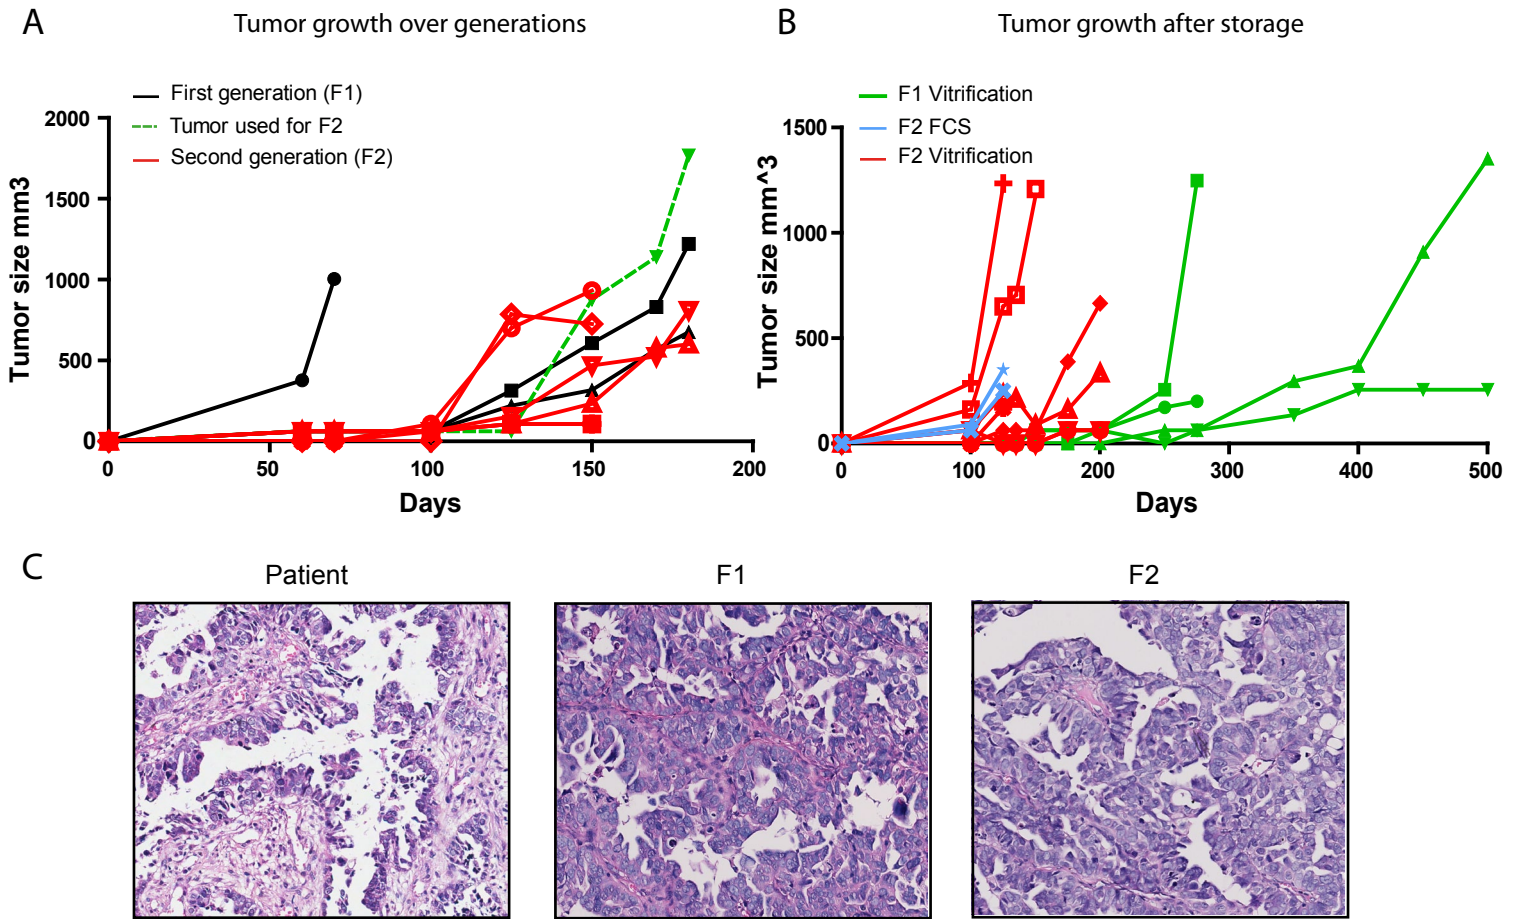

**Supplementary figure S4. (A)** Tumour growth of fresh implanted tumour tissue from patient 37 and further propagation of the tumour (green line) into the second generation (red lines). **(B)** Tumour growth of stored and subsequently thawed and re-implanted tumour tissue from patient 37. Tumour tissue was either directly frozen after patients primary surgery (F1) using the vitrification (green line) protocol. After establishment of a PDX, tumour tissue was harvested from the mouse (F2) and frozen using either the vitrification (red line) or FCS/DMSO (blue line) protocol. **(C)** Representative H&E staining of patient 37 over several generations (F1 and F2). Magnification 10x and 40x.

PDX 61

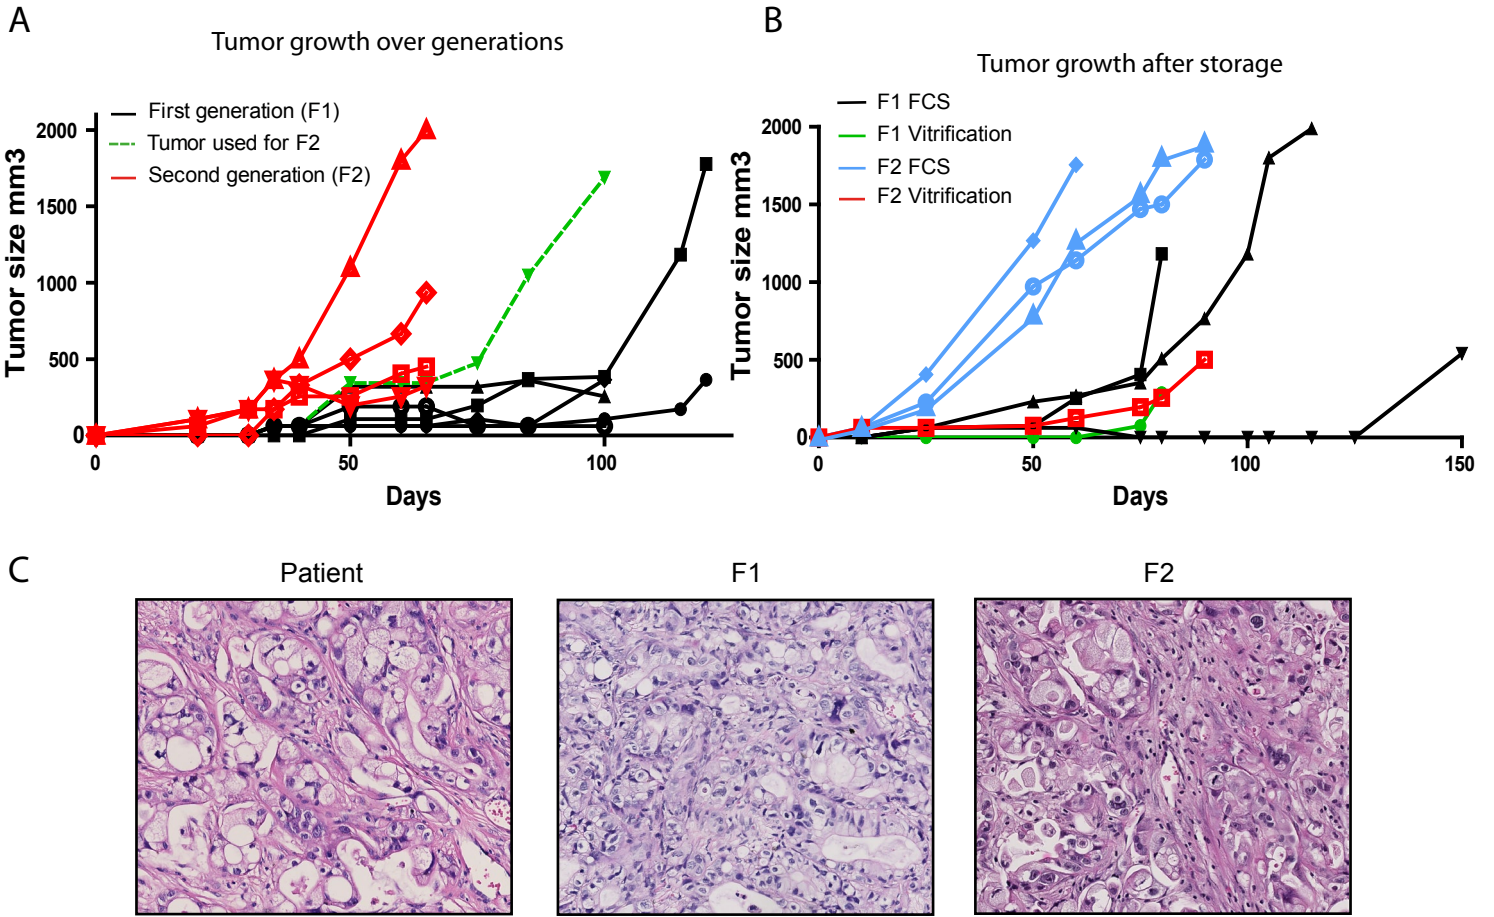

**Supplementary figure S5. (A)** Tumour growth of fresh implanted tumour tissue from patient 61 and further propagation of the tumour (green line) into the second generation (red lines). **(B)** Tumour growth of stored and subsequently thawed and re-implanted tumour tissue from patient 61. Tumour tissue was either directly frozen after patients primary surgery (F1) using either the vitrification (green line) or FCS/DMSO (black line) protocol. After establishment of a PDX, tumour tissue was harvested from the mouse (F2) and frozen using either the vitrification (red line) or FCS/DMSO (blue line) protocol. **(C)** Representative H&E staining of patient 61 over several generations (F1 and F2). Magnification 10x.



Supplementary figure 6

**PDX 67**

**A**

Tumor growth over generations

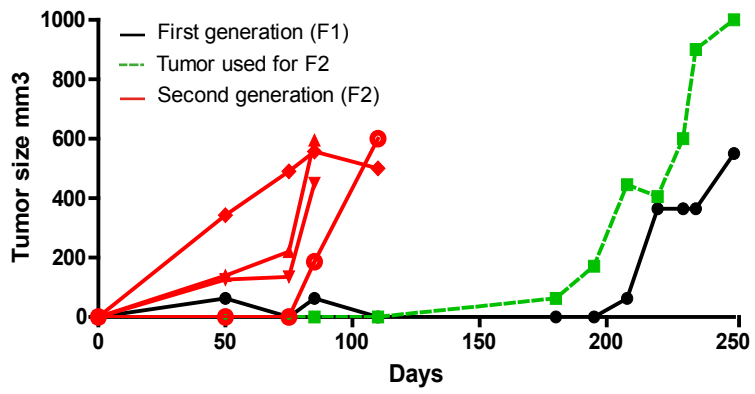

**B**

Tumor growth after storage

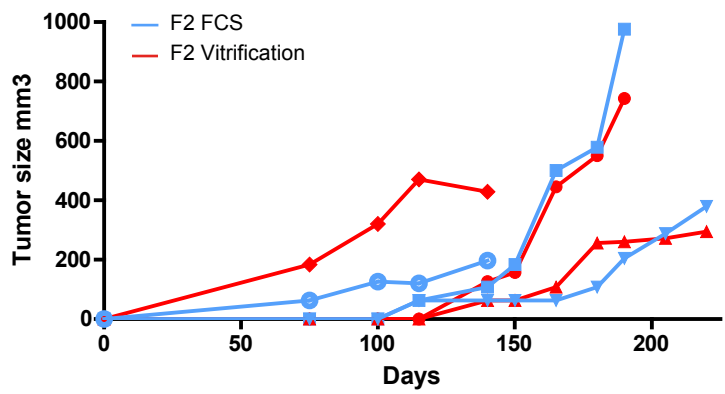

**C**

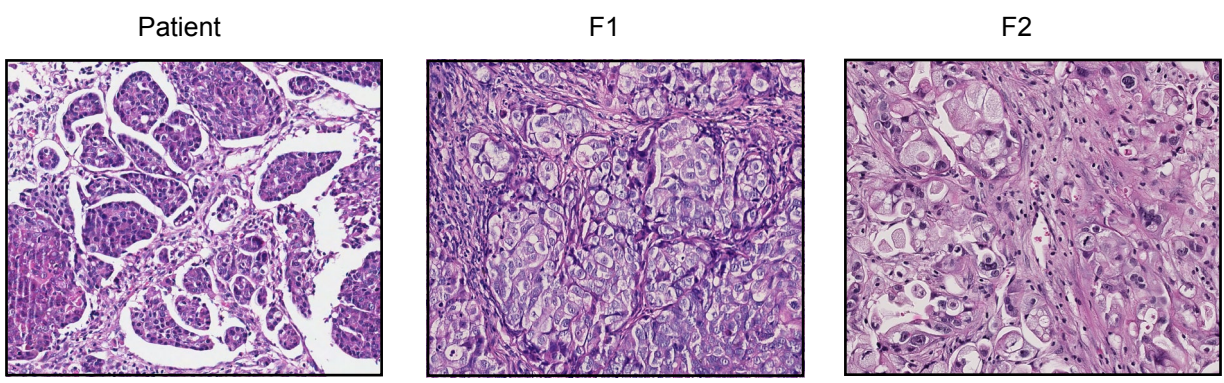



**Supplementary figure S6. (A)** Tumour growth of fresh implanted tumour tissue from patient 67 and further propagation of the tumour (green line) into the second generation (red lines). **(B)** Tumour growth of stored and subsequently thawed and re-implanted tumour tissue from patient 67. After establishment of a PDX, tumour tissue was harvested from the mouse (F2) and frozen using either the vitrification (red line) or FCS/DMSO (blue line) protocol. **(C)** Representative H&E staining of patient 67 over several generations (F1 and F2). Magnification 10x.

# Supplementary figure 7

## A Patient 30

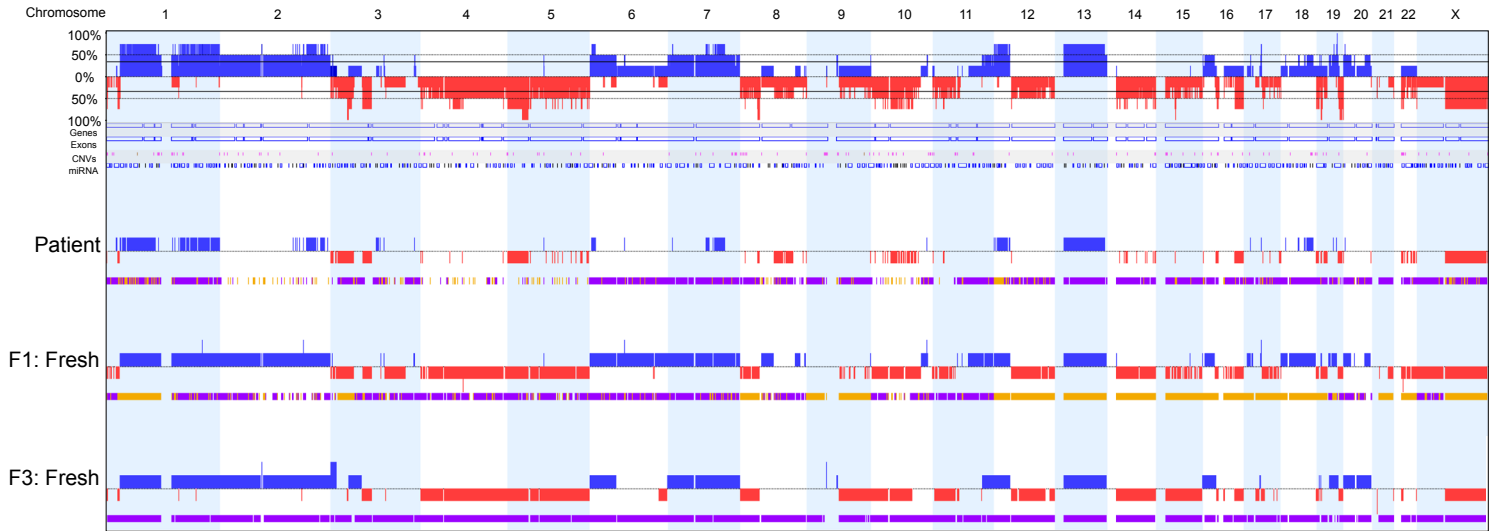

## B Patient 36

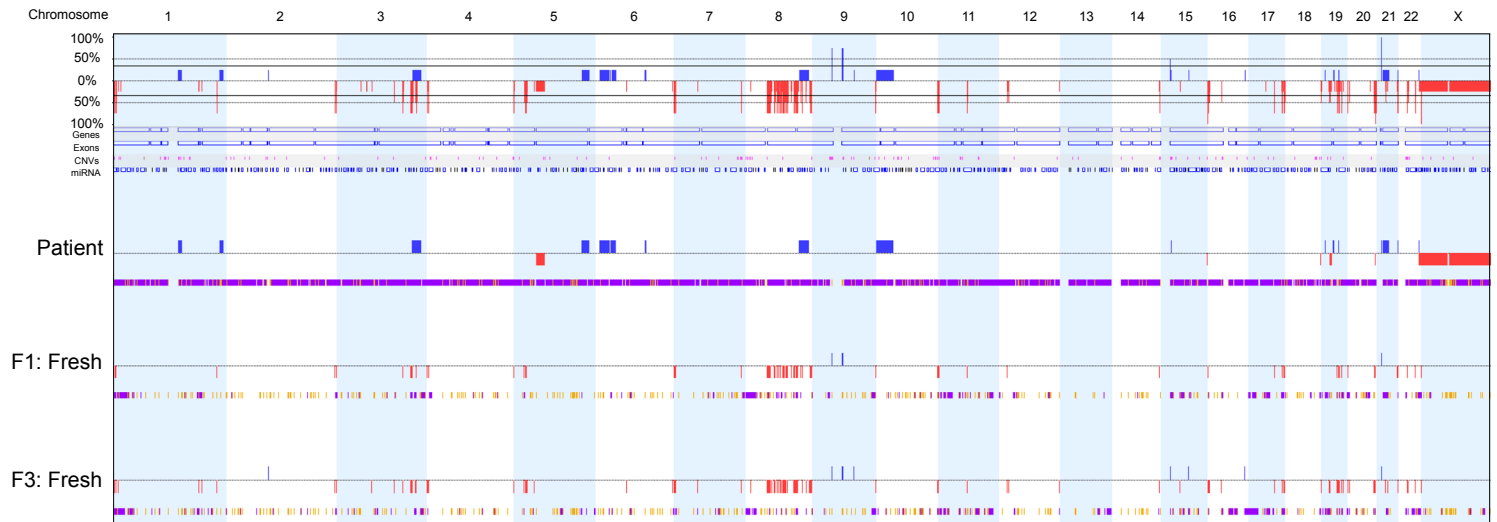

## C Patient 37

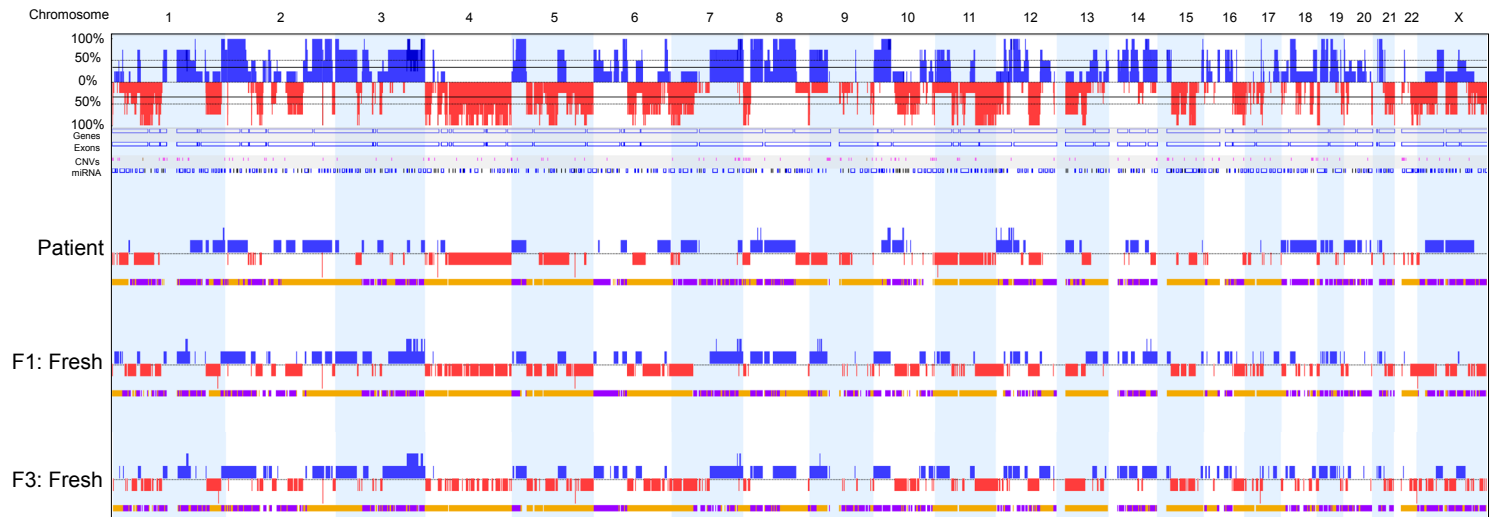

**Supplementary figure S7.** Copy number alterations (CNAs) analysis of PDX tumors of patient 30 (Suppl. Fig. 6A), 36 (Suppl. Fig. 6B) and 37 (Suppl. Fig. 6C) using genome-wide SNP array. CNA plots represented the copy number alterations between the primary tumour of the patient, PDX tumour after first engraftment (F1) and PDX tumour after third engraftment (F3). Genomic gain is indicated in blue and genomic loss is indicated in red over all chromosomes. At top of each comparative CNA plot for each sample, the average genomic alteration of all three samples is presented in similar manner (blue: amplification and red: loss). Below each CNA plot of each sample, the bar with colours represents the allelic events (yellow for loss of heterozygosity (LOH); purple for allelic imbalance).

# Supplementary figure 8

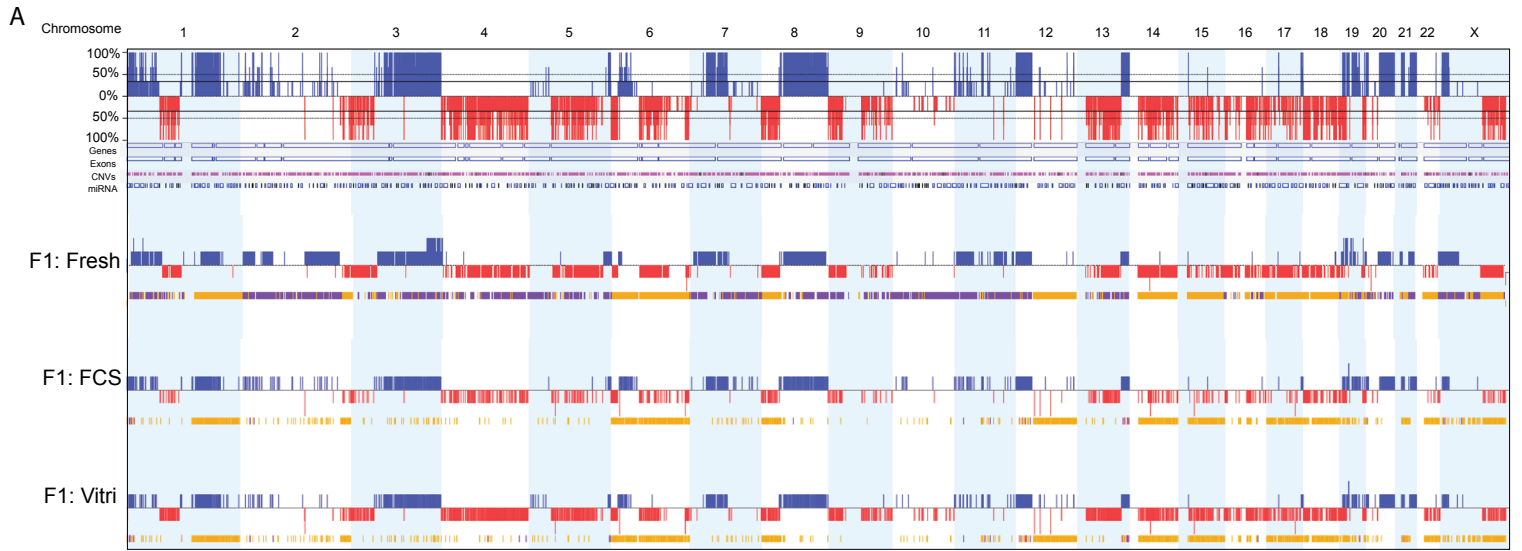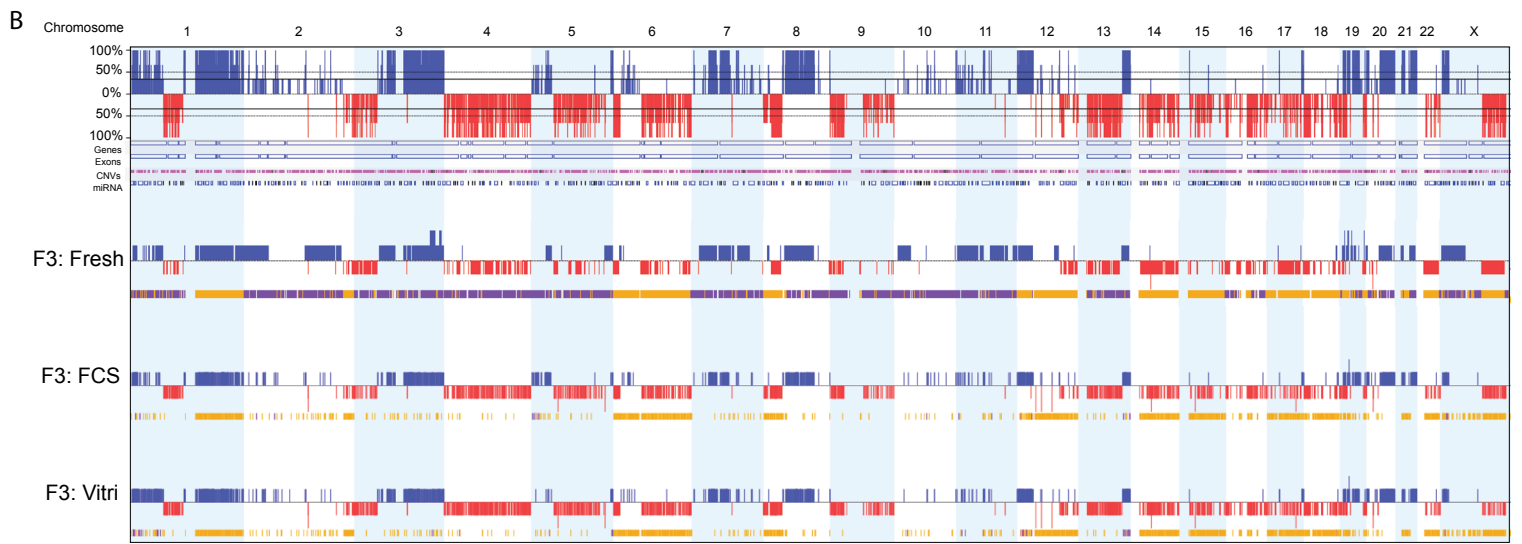

**Supplementary figure S8.** Copy number analysis (CNA) of PDX tumors of patient 56 using genome-wide SNP array. Comparative CNA plots of biobanked PDX tumor by FCS/DMSO and vitrification methods to their corresponding freshly implanted tumors either from human patients directly (F1) **(A)**, or from serial transplantation from mouse (F3) **(B)**. Genomic gain is indicated in blue and genomic loss is indicated in red over all chromosomes. At top of each comparative CNA plot for each sample, the average genomic alteration of all three samples is presented in similar manner (blue: amplification and red: loss). Below each CNA plot of each sample, the bar with colors represents the allelic events (yellow for loss of heterozygosity (LOH); purple for allelic imbalance).

F1 generation growth data combined

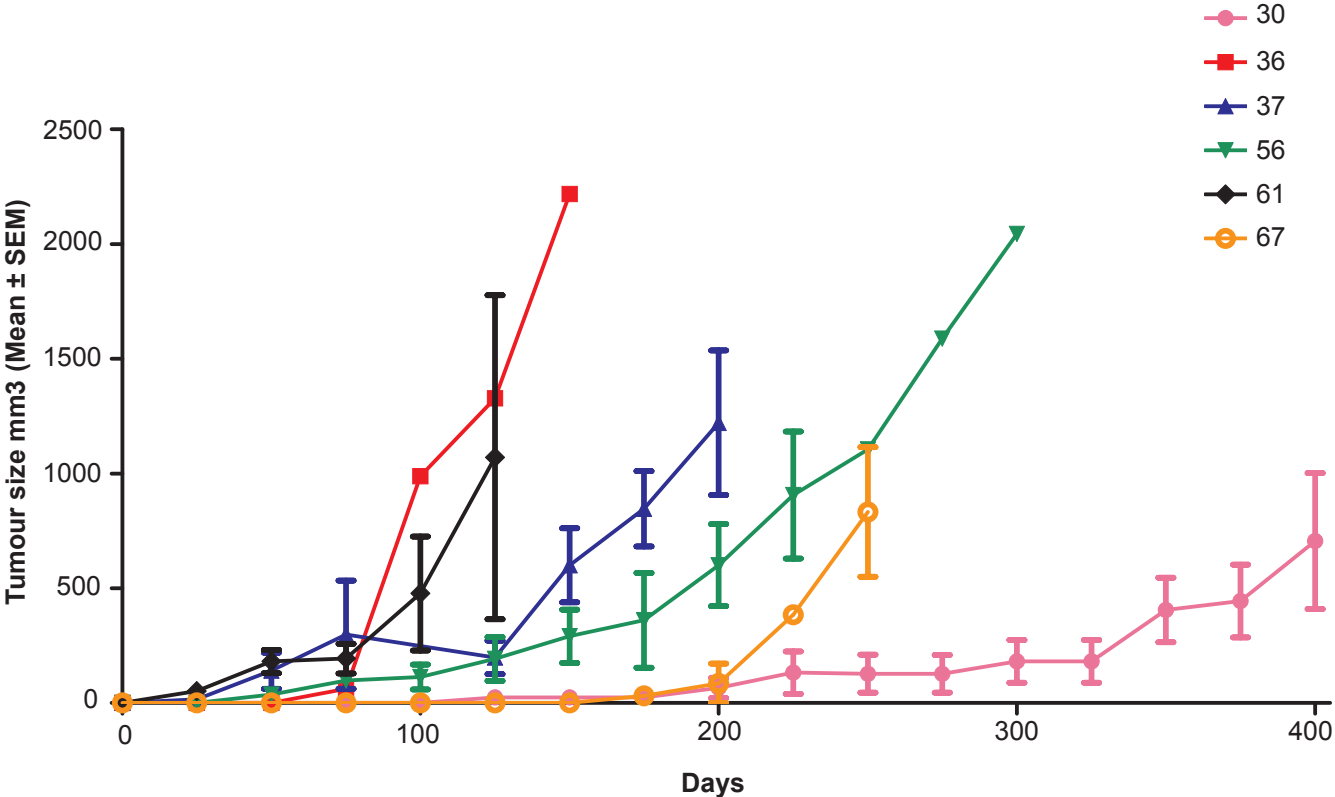

**Supplementary figure S9.** Growth curves of 6 of the PDXs in F1 generation, depicted as mean of all growing tumours combined  $\pm$  SEM.

## Supplementary tables

**Supplementary table 1.** Complete list of established ovarian cancer PDXs including histological subtype, time of tissue collection and status at last follow-up.

| PDX  | Histological subtype | Grade    | Stage | Tissue obtained at primary or interval debulking or at relapse | Status at last follow-up |
|------|----------------------|----------|-------|----------------------------------------------------------------|--------------------------|
| 30   | Serous               | High     | IIIC  | Primary                                                        | Relapse after 24 months  |
| 36   | Serous               | High     | IIIC  | Primary                                                        | Relapse after 18 months  |
| 37   | Serous               | High     | IIIC  | Primary                                                        | Disease-free at last FU  |
| 56   | Serous               | High     | IIIC  | Interval                                                       | Disease-free at last FU  |
| 60   | Mucinous             | High     | IIA   | Primary                                                        | No response, deceased    |
| 61   | Mixed                | NA       | IV    | Primary                                                        | No response, deceased    |
| 67   | Serous               | High     | IIIC  | Primary                                                        | Disease-free at last FU  |
| 68a  | Serous               | High     | IIC   | Primary                                                        | Relapse after 26 months  |
| 68b  | Serous               | High     | NA    | Relapse 68a                                                    | Re-debulking             |
| 70   | Serous               | High     | IIIA  | Primary                                                        | Disease-free at last FU  |
| 79   | Serous               | Low      | IIIC  | Primary                                                        | No response, deceased    |
| 81   | Endometrioid         | Moderate | IC    | Primary                                                        | Disease-free at last FU  |
| 84   | Serous               | High     | IV    | Primary                                                        | Disease-free at last FU  |
| 112  | Endometrioid         | High     | IIIC  | Relapse                                                        | Disease-free at last FU  |
| 130  | Serous               | High     | IIIB  | Primary                                                        | Disease-free at last FU  |
| 137  | Serous               | High     | IV    | Interval                                                       | Disease-free at last FU  |
| 143  | Serous               | High     | IIIC  | Interval                                                       | No FU                    |
| 155  | Clear cell           | NA       | IIIC  | Primary                                                        | No response, deceased    |
| 157  | Endometrioid         | High     | IV    | Primary                                                        | No response, deceased    |
| 158  | Serous               | High     | IC    | Interval                                                       | No FU                    |
| 160  | Serous               | High     | IV    | Primary                                                        | Palliative treatment     |
| 167  | Endometrioid         | Low      | IV    | Interval                                                       | Moderate response        |
| 169  | Serous               | High     | IIIC  | Interval                                                       | Relapse after 14 months  |
| 171  | Serous               | High     | III   | Relapse                                                        | Relapse after 37 months  |
| 174  | Serous               | High     | IV    | Interval                                                       | Disease-free at last FU  |
| 176  | Serous               | High     | IIIC  | Primary                                                        | Disease-free at last FU  |
| 177  | Serous               | High     | IIC   | Primary                                                        | Disease-free at last FU  |
| 179  | Serous               | High     | IIIC  | Interval                                                       | No response, deceased    |
| 180  | Clear cell           | NA       | IIIC  | Interval                                                       | No response, deceased    |
| 183a | Serous               | High     | IIIC  | Primary                                                        | Disease-free at last FU  |
| 183b | Serous               | High     | NA    | Relapse 183a                                                   | Relapse after 11 months  |
| 187  | Serous               | High     | IIIC  | Interval                                                       | Good response            |
| 188  | Serous               | High     | IIIC  | Primary                                                        | No response, deceased    |
| 189  | Endometrioid         | High     | IC    | Primary                                                        | Disease-free at last FU  |
| 191  | Mixed                | NA       | IIIC  | Primary                                                        | Disease-free at last FU  |
| 193  | Serous               | High     | IIIC  | Primary                                                        | Disease-free at last FU  |
| 195  | Serous               | High     | IV    | Primary                                                        | Disease-free at last FU  |
| 200  | Serous               | High     | IIIC  | Interval                                                       | No response, deceased    |
| 202  | Serous               | Moderate | IIIC  | Interval                                                       | Good response            |
| 203  | Serous               | High     | IIIC  | Primary                                                        | Disease-free at last FU  |
| 207  | Serous               | High     | IIIC  | Primary                                                        | Disease-free at last FU  |
| 208  | Endometrioid         | Low      | IIB   | Primary                                                        | Disease-free at last FU  |
| 225  | Mixed                | NA       | IIIC  | Primary                                                        | Disease-free at last FU  |
| 229  | Endometrioid         | Low      | IC    | Relapse                                                        | Relapse after 30 months  |
| 237  | Clear cell           | NA       | IIIC  | Primary                                                        | Progressive disease      |

All patients received either neo-adjuvant or adjuvant carboplatin/taxol chemotherapy. Abbreviations: NA=non-applicable, FU=follow-up.



**Supplementary table 2.** Take rate of fresh implanted primary tumour and implanted tumour after preservation via vitrification and/or FCS/DMSO in 8 selected PDXs.

| <b>Generation</b>                                      | <b>F1</b>   | <b>Latency time spread</b> | <b>F2</b>   | <b>Latency time spread</b> |
|--------------------------------------------------------|-------------|----------------------------|-------------|----------------------------|
| <b>Take rate tumour pieces<br/>(n= tumour pieces):</b> |             |                            |             |                            |
| <b>Fresh propagation</b>                               | 27/44 (61%) | 10-270 days                | 31/34 (91%) | 7-104 days                 |
| <b>Vitrification</b>                                   | 8/21 (38%)  | 70- 320 days               | 16/24 (67%) | 35-155 days                |
| <b>FCS/DMSO</b>                                        | 6/9 (67%)   | 18-220 days                | 32/34 (94%) | 10-115 days                |
| <b>Established PDX<br/>(n= patients):</b>              |             |                            |             |                            |
| <b>Fresh propagation</b>                               | 8/8 (100%)  |                            | 8/8 (100%)  |                            |
| <b>Vitrification</b>                                   | 4/5 (80%)   |                            | 5/5 (100%)  |                            |
| <b>FCS/DMSO</b>                                        | 2/3 (67%)   |                            | 7/7 (100%)  |                            |

Abbreviations: FCS = Fetal Calf Serum, DMSO = Dimethyl sulfoxide, F = generation number, PDX= patient-derived xenograft.

| <b>Supplementary Table 3.</b> Preparation of solutions needed for vitrification and thawing.                                                                                      |                     |              |               |             |
|-----------------------------------------------------------------------------------------------------------------------------------------------------------------------------------|---------------------|--------------|---------------|-------------|
| <b>Vitrification</b>                                                                                                                                                              | <b>Rinse medium</b> | <b>VS 1</b>  | <b>VS 2</b>   | <b>VS 3</b> |
| Temperature                                                                                                                                                                       | Room temp           | Room temp    | Room temp     | 4°C         |
| HBSS (mL)                                                                                                                                                                         | 18                  | 16.5         | 15            | 12          |
| FCS (mL)                                                                                                                                                                          | 2                   | 2            | 2             | 2           |
| DMSO (mL)                                                                                                                                                                         | -                   | 0.5          | 1             | 2           |
| Propanediol (mL)                                                                                                                                                                  | -                   | 0.5          | 1             | 2           |
| Ethylene Glycol (mL)                                                                                                                                                              | -                   | 0.5          | 1             | 2           |
| PVP (g)                                                                                                                                                                           | -                   | -            | -             | 2           |
| Time (min)                                                                                                                                                                        | 5                   | 5            | 10            | 10          |
| <b>Thawing</b>                                                                                                                                                                    | <b>TS 1</b>         | <b>TS 2</b>  | <b>TS 3</b>   | <b>TS 4</b> |
| Temperature                                                                                                                                                                       | Room temp           | Room temp    | Room temp     | Room temp   |
| HBSS (mL)                                                                                                                                                                         | 10                  | 10           | 10            | 9           |
| Sucrose (g)                                                                                                                                                                       | 1.71 (0.5M)         | 0.86 (0.25M) | 0.43 (0.125M) | -           |
| FCS (mL)                                                                                                                                                                          | -                   | -            | -             | 1           |
| Time (min)                                                                                                                                                                        | 2                   | 5            | 5             | 5           |
| Abbreviations: VS= Vitrification solution, HBSS= Hank's balanced salt solution , FCS= Fetal Calf Serum, DMSO= Dimethylsulfoxide, PVP= Polyvinylpyrrolidone, TS= Thawing solution. |                     |              |               |             |

| <b>Supplementary table 4.</b> Antibodies used for immunohistochemical staining                                                                                                                                                                                                                                                           |                          |                                |                 |                        |                         |
|------------------------------------------------------------------------------------------------------------------------------------------------------------------------------------------------------------------------------------------------------------------------------------------------------------------------------------------|--------------------------|--------------------------------|-----------------|------------------------|-------------------------|
| <b>Antigen</b>                                                                                                                                                                                                                                                                                                                           | <b>Antigen retrieval</b> | <b>Company (catalogue no.)</b> | <b>Dilution</b> | <b>Incubation time</b> | <b>Detection method</b> |
| Ki67                                                                                                                                                                                                                                                                                                                                     | TRIS/EDTA (pH 9.0)       | DAKO (M7240)                   | 1:350           | 60 minutes<br>20 °C    | RAMpo-<br>GARpo         |
| CD31                                                                                                                                                                                                                                                                                                                                     | Citrate (pH 6.0)         | Dianova<br>(DIA 310)           | 1:100           | 60 minutes<br>20 °C    | RARbio-<br>StrepHRP     |
| WT1                                                                                                                                                                                                                                                                                                                                      | Citrate (pH 6.0)         | Dako (M3561)                   | 1:100           | 60 minutes<br>20 °C    | RAMpo-<br>GARpo         |
| Vimentin anti<br>human                                                                                                                                                                                                                                                                                                                   | EDTH (pH 8.0)            | Santa Cruz<br>(sc 6260)        | 1:150           | 60 minutes<br>20 °C    | RAMpo-<br>GARpo         |
| Vimentin anti<br>human/mouse                                                                                                                                                                                                                                                                                                             | Citrate (pH 6.0)         | Cell signaling<br>(D21H3)      | 1:50            | o/n 4°C                | GARpo-<br>RAGpo         |
| ER                                                                                                                                                                                                                                                                                                                                       | TRIS/HCl (pH 9.0)        | Ventana (SP1)                  | NA              | 60 minutes<br>20 °C    | GARbio-<br>StrepHRP     |
| PR                                                                                                                                                                                                                                                                                                                                       | TRIS/HCl (pH 9.0)        | Ventana (1E2)                  | NA              | 60 minutes<br>20 °C    | GARbio-<br>StrepHRP     |
| Abbreviations: RAMpo= Rabbit- anti- Mouse horseradish peroxidase, GARpo= Goat- anti- Rabbit horseradish peroxidase, RAGpo= Rabbit-anti-Goat horseradish peroxidase, RARbio= Rabbit- anti- Rat biotinylated, GARbio= Goat- anti- Rabbit biotinylated, StrepHRP= streptavidin horseradish peroxidase, o/n = overnight, NA= non applicable. |                          |                                |                 |                        |                         |
